# Supplementary figures and images for: Coomassie brilliant blue G-250 acts as a potential chemical chaperone to stabilize therapeutic insulin
Source: Royal Society of Chemistry journal article supplement (doi:10.1039/d3cc01791e), 2023-01-01

## Raw Images (Western Blot and Gel electrophoresis):

**Figure 2B**

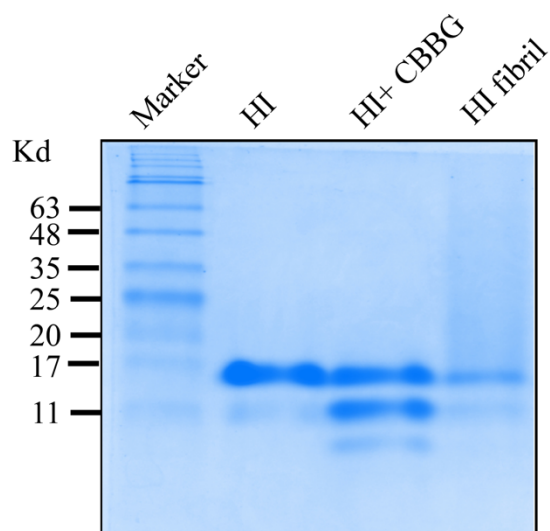

**Figure 4C**

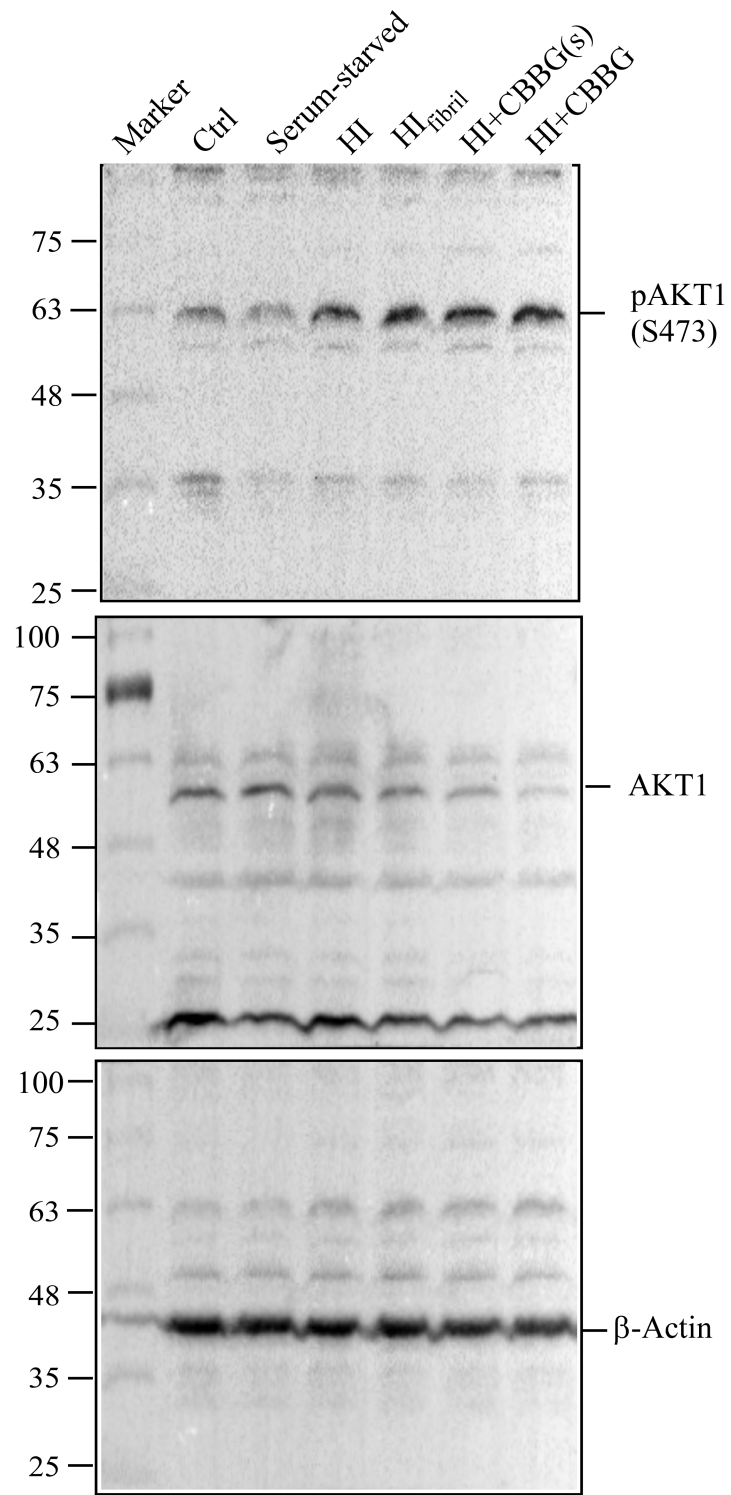

Supplement: d3cc01791e1.pdf [file d3cc01791e1.pdf]
